# Supplementary material for: Quantitative Viral Community DNA Analysis Reveals the Dominance of Single-Stranded DNA Viruses in Offshore Upper Bathyal Sediment from Tohoku, Japan
Source: PubMed Central journal article supplement (PMC5807898; doi:10.3389/fmicb.2018.00075), 2018-02-06
Supplement: Presentation_1.pdf [file Presentation_1.pdf]

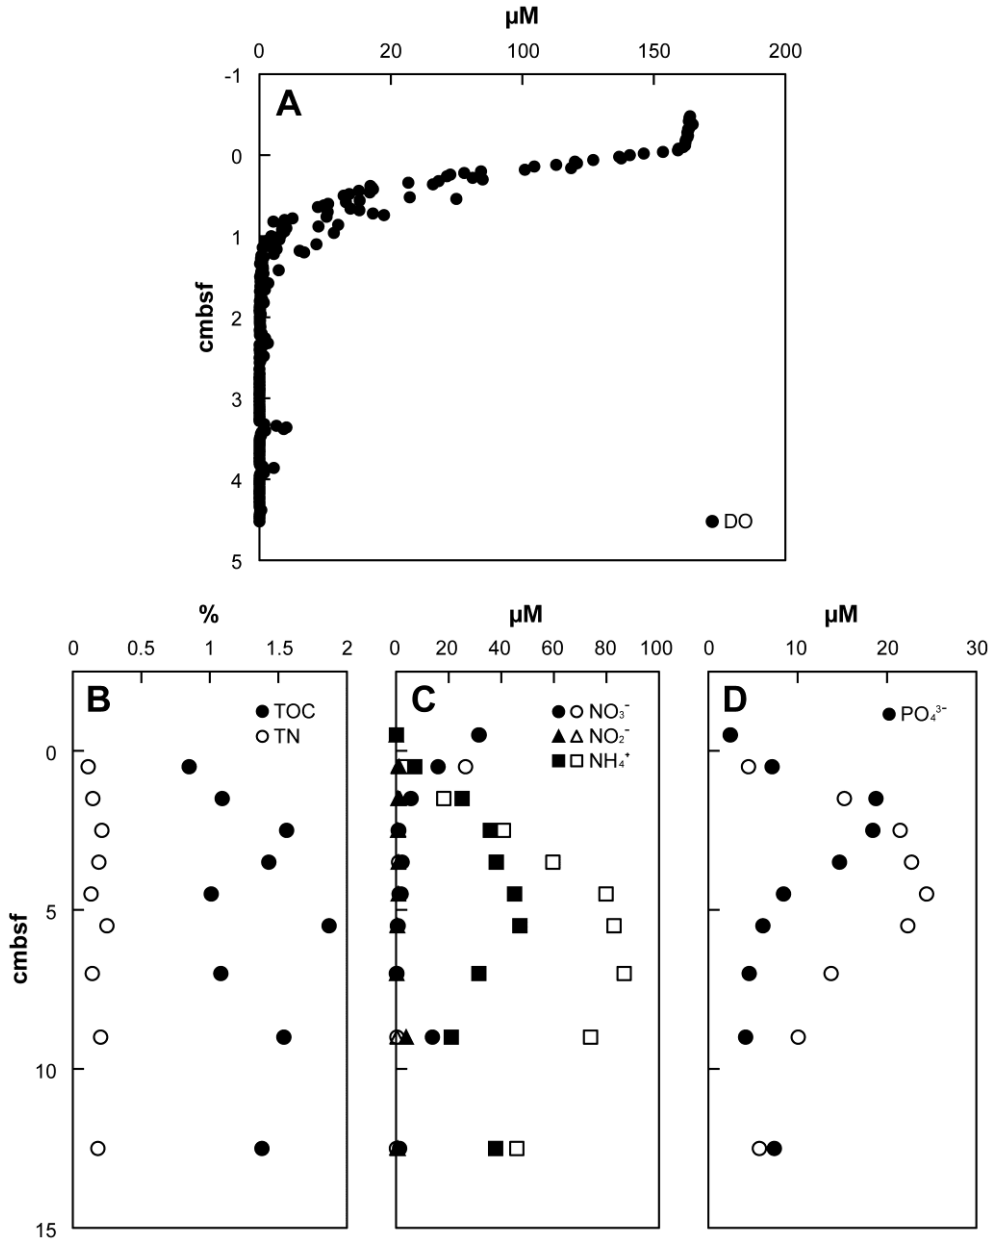

**Figure S1**

Geochemical characteristics of the off-Tohoku sediment core (station N-500 site; Nomaki et al., 2016a). (A) Dissolved oxygen concentration ( $\mu\text{M}$ ). (B) Total organic carbon content (weight % of TOC) and total nitrogen content (wt% of TN). The TOC/TN ratios were constant (7.4–7.6) throughout the core depth. (C) Pore-water nitrate, nitrite, and ammonium and (d) phosphate concentrations ( $\mu\text{M}$ ). Filled and open symbols represent profiles from replicate cores.

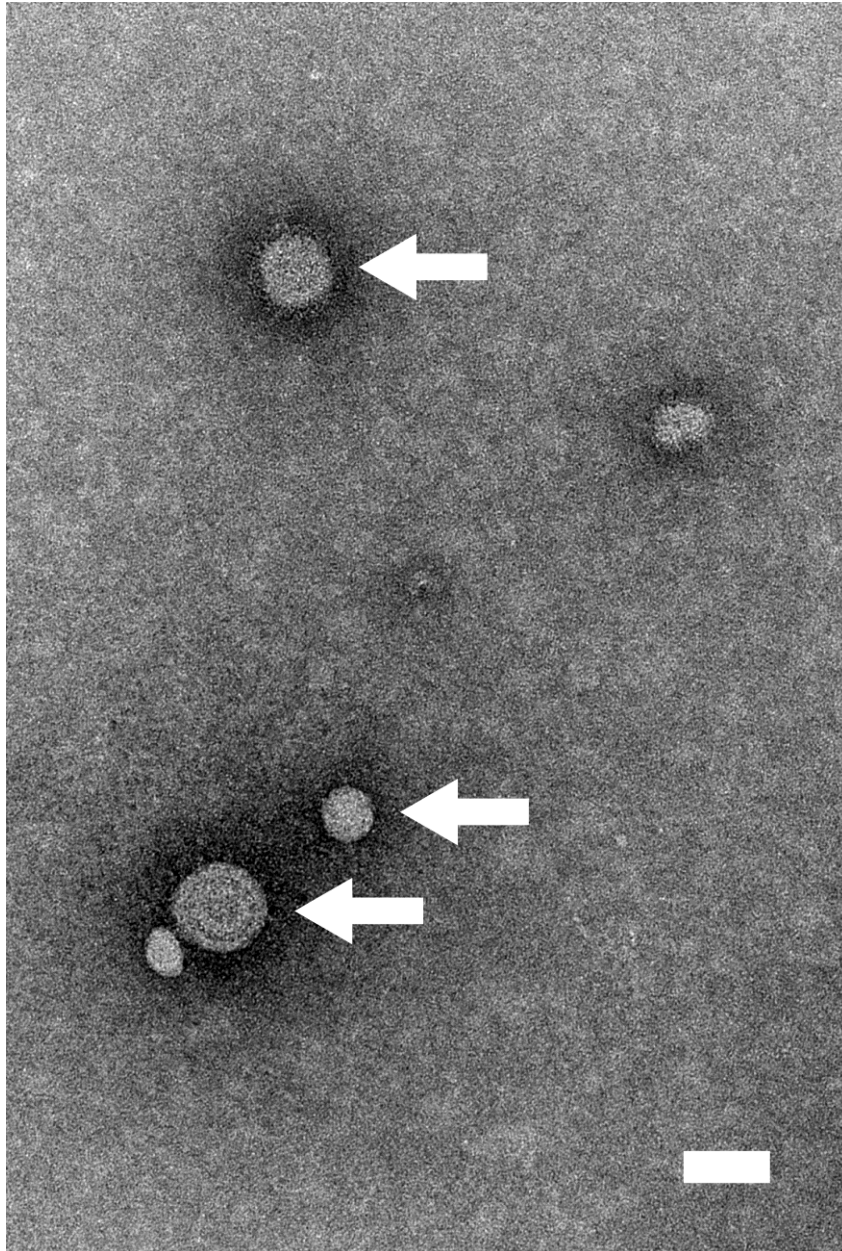

**Figure S2**

Transmission electron micrograph of non-tailed virus-like particles (arrows) observed in this study. The bar indicates 50 nm.
